# Supplementary material for: Super-assembled periodic mesoporous organosilica membranes with hierarchical channels for efficient glutathione sensing
Source: Royal Society of Chemistry journal article supplement (doi:10.1039/d4an00559g), 2024-01-01
Supplement: d4an00559g1.pdf [file d4an00559g1.pdf]

## Supplementary Information

### Super-Assembled Periodic Mesoporous Organosilica Membranes with Hierarchical Channels for Efficient Glutathione Sensing

*Hui Zeng,<sup>a</sup> Shan Zhou,<sup>a</sup> Xin Zhang,<sup>a</sup> Qirui Liang,<sup>a</sup> Miao Yan,<sup>a</sup> Yeqing Xu,<sup>a</sup> Yaxin Guo,<sup>a</sup> Xiaomeng Hu,<sup>a</sup> Lei Jiang<sup>b</sup> and Biao Kong<sup>a,c,d\*</sup>*

<sup>a</sup> Department of Chemistry, Shanghai Key Lab of Molecular Catalysis and Innovative Materials and Collaborative Innovation Center of Chemistry for Energy Materials, Fudan University, Shanghai 200438, P. R. China

<sup>b</sup> CAS Key Laboratory of Bio-Inspired Materials and Interfacial Science, Technical Institute of Physics and Chemistry, Chinese Academy of Science, Beijing 100190, P. R. China

<sup>c</sup> Yiwu Research Institute of Fudan University, Yiwu, Zhejiang 322000, P. R. China

<sup>d</sup> Shandong Research Institute, Fudan University, Jinan, Shandong 250103, P. R. China

\* Corresponding author: Biao Kong (B.K.)

Email address: bkong@fudan.edu.cn

## Table of contents

|          |                                                                                                         |
|----------|---------------------------------------------------------------------------------------------------------|
| Fig. S1  | TEM image of the mesostructured organic-inorganic hybrid nanoparticles before structural transformation |
| Fig. S2  | SEM images of the PMOs                                                                                  |
| Fig. S3  | FT-IR spectra of the PMOs                                                                               |
| Fig. S4  | $^{29}\text{Si}$ MAS NMR spectra of the PMOs                                                            |
| Fig. S5  | Optical image of the pure AAO                                                                           |
| Fig. S6  | SEM images of the pure AAO                                                                              |
| Fig. S7  | SEM images of the PMO/AAO with 25 wt % loading of PMOs                                                  |
| Fig. S8  | SEM images of the PMO/AAO with 30 wt % loading of PMOs                                                  |
| Fig. S9  | SEM images of the PMO/AAO with 35 wt % loading of PMOs                                                  |
| Fig. S10 | SEM images of the PMO/AAO with 45 wt % loading of PMOs                                                  |
| Fig. S11 | Effect of temperature and pH on the detection of GSH                                                    |
| Table S1 | Sensing of GSH in FBS samples                                                                           |

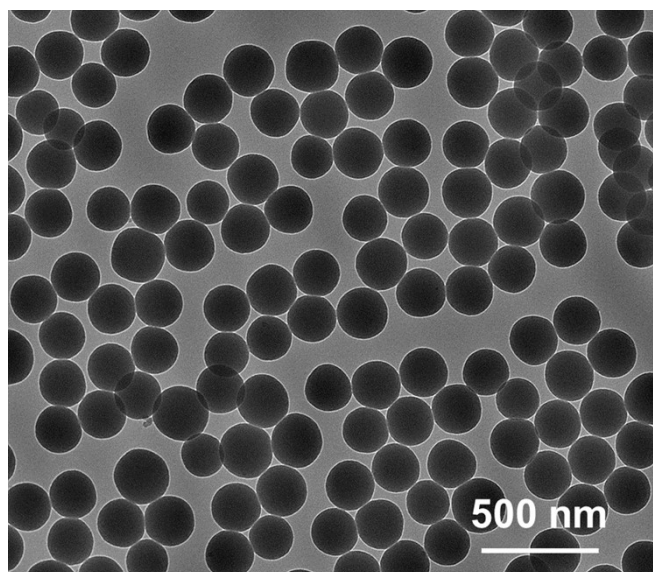

**Fig. S1** TEM image of the mesostructured organic-inorganic hybrid nanoparticles before structural transformation.

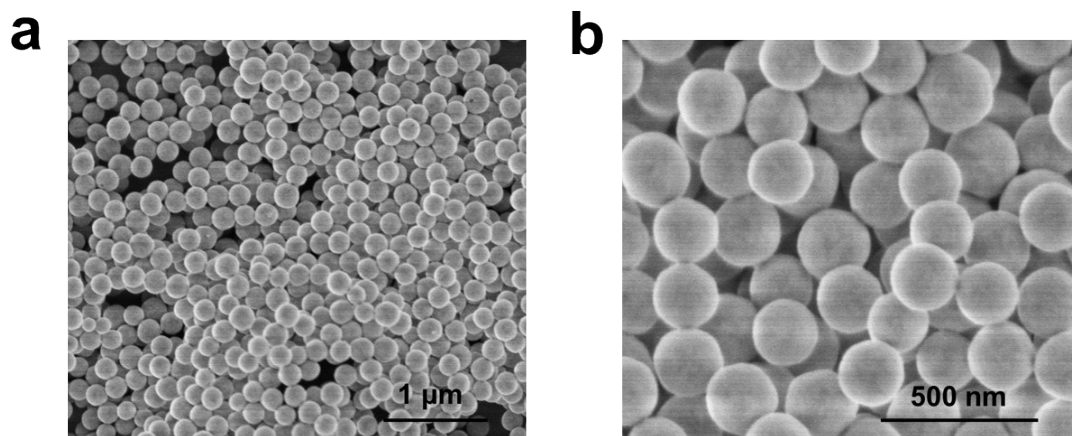

**Fig. S2** SEM image (a) and magnified view (b) of the thioether-bridged PMOs with yolk-shell structure.

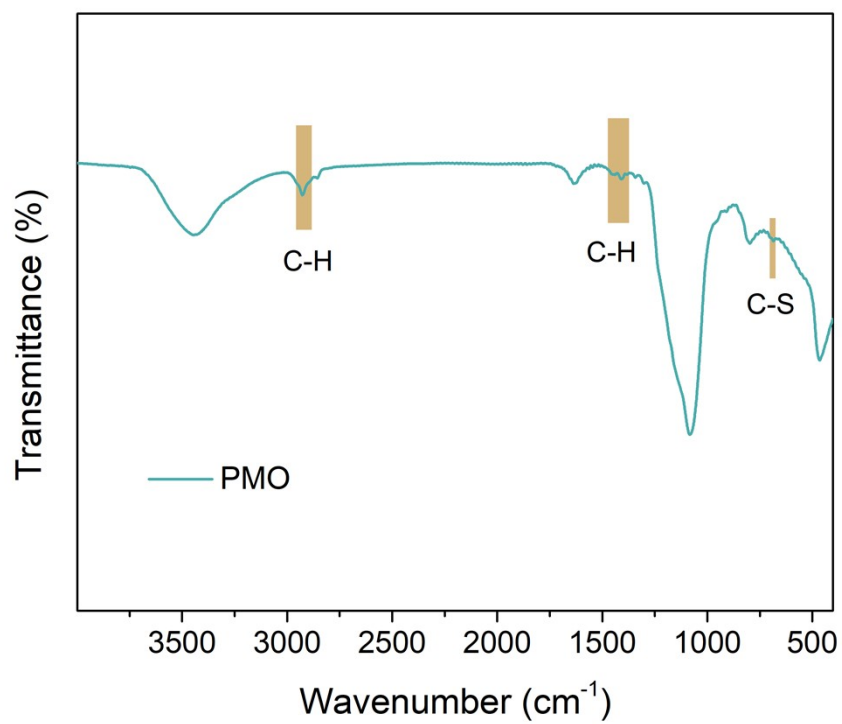

**Fig. S3** FT-IR spectra of as-made PMOs.

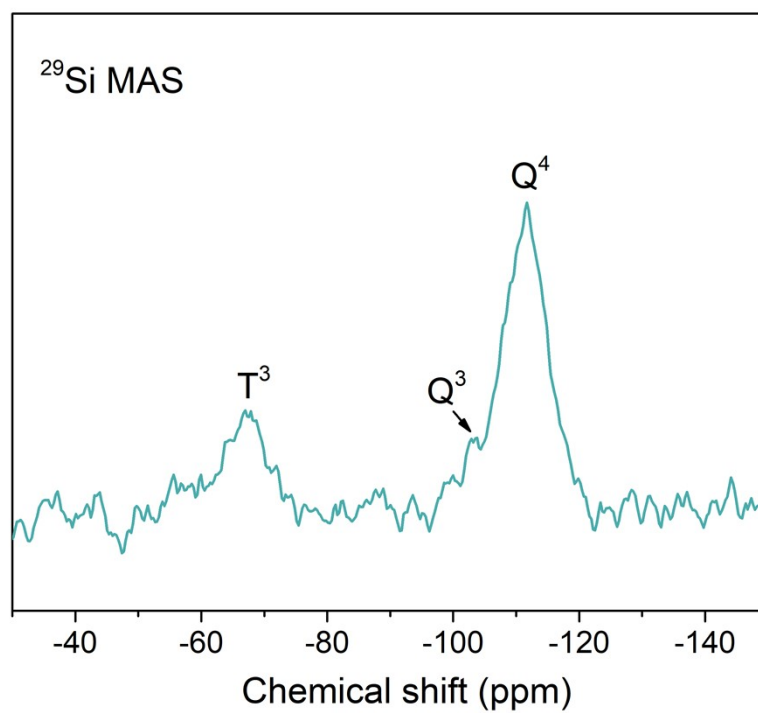

**Fig. S4**  $^{29}\text{Si}$  MAS NMR spectra of as-made PMOs.

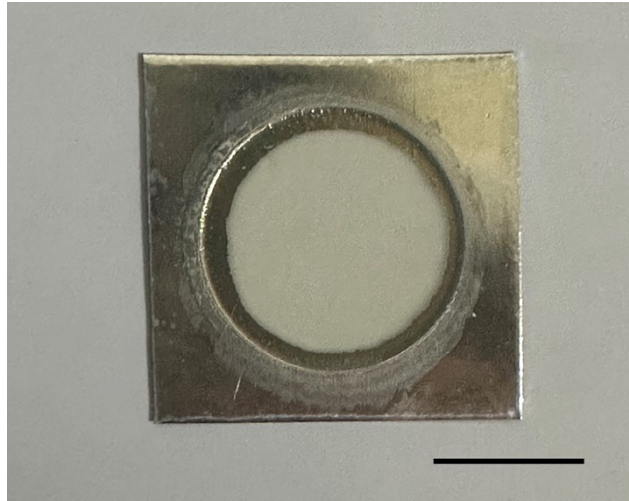

**Fig. S5** Optical image of the pure AAO (Scale is 1 cm).

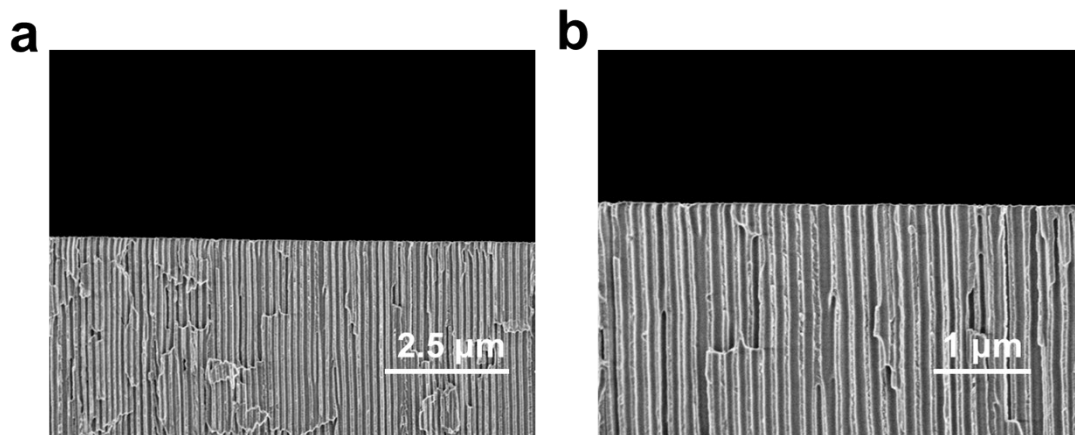

**Fig. S6** Cross-sectional SEM images (a, b) of the AAO membrane.



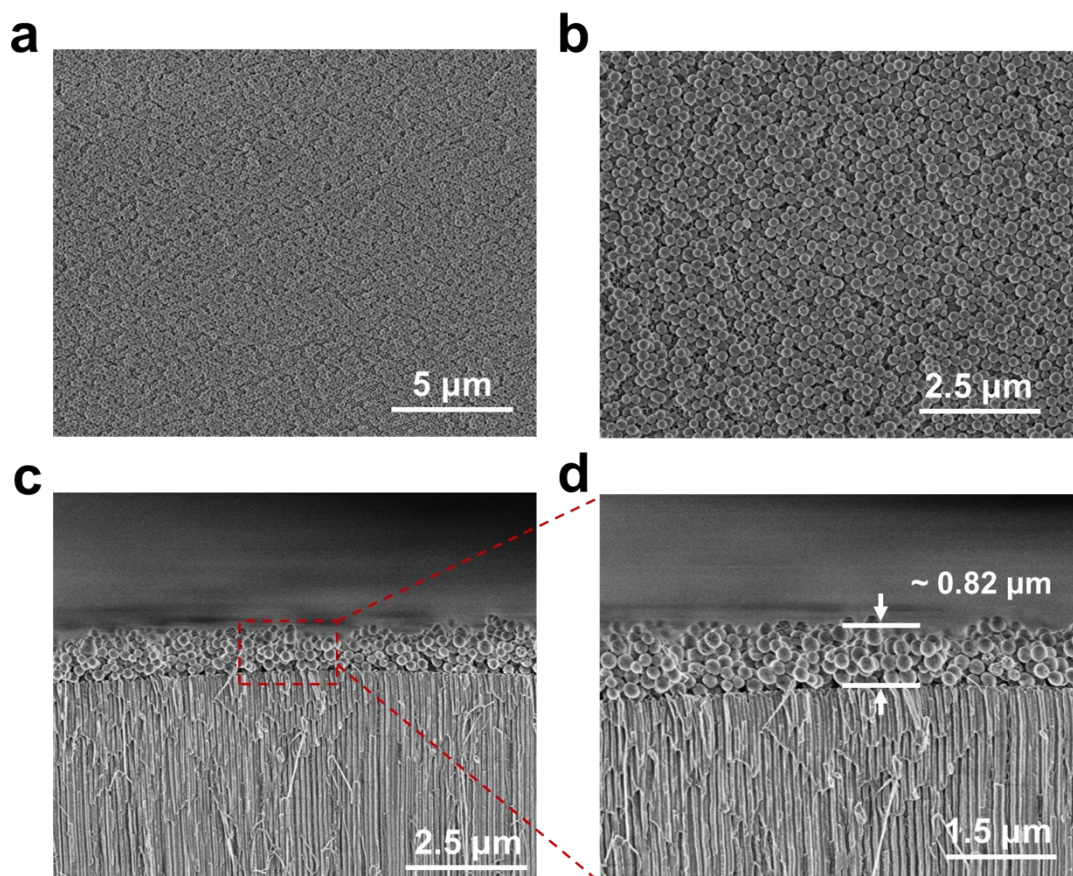

**Fig. S7** Surface SEM images (a, b) and cross-sectional images (c, d) of the PMO/AAO membrane with 25 wt % loading of PMOs.

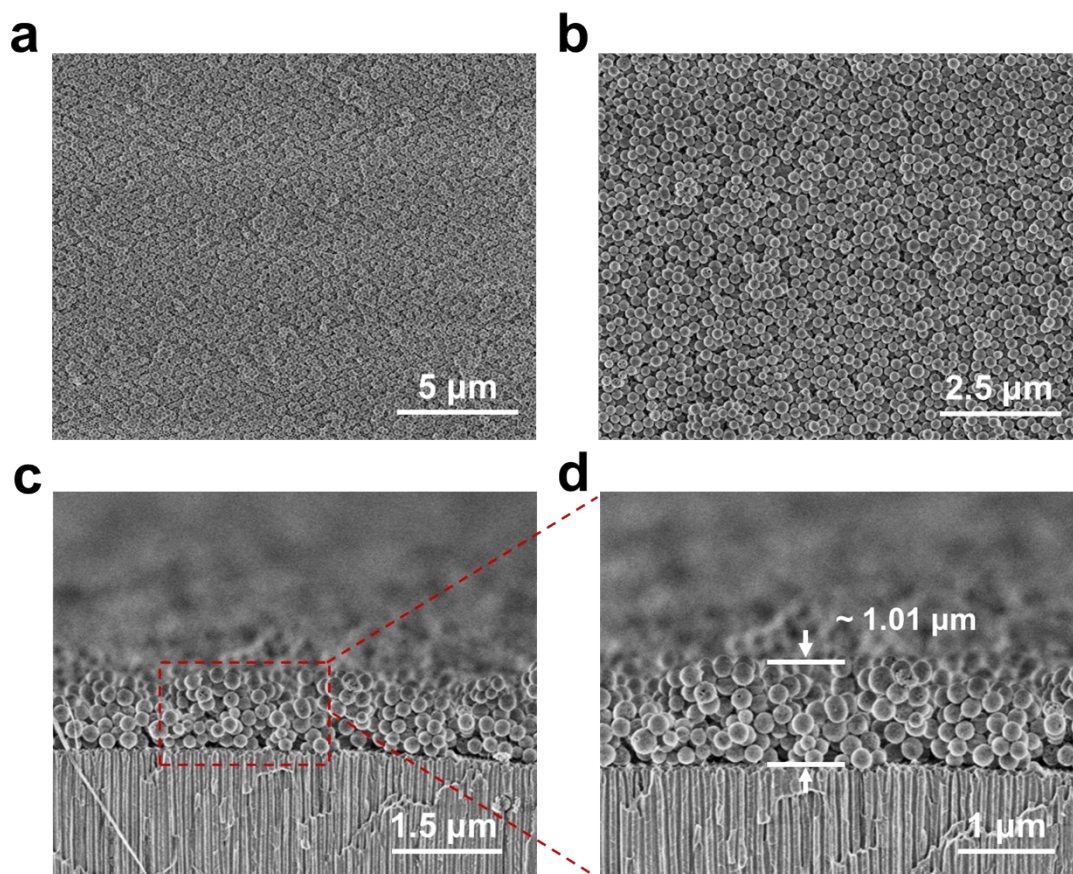

**Fig. S8** Surface SEM images (a, b) and cross-sectional images (c, d) of the PMO/AAO membrane with 30 wt % loading of PMOs.

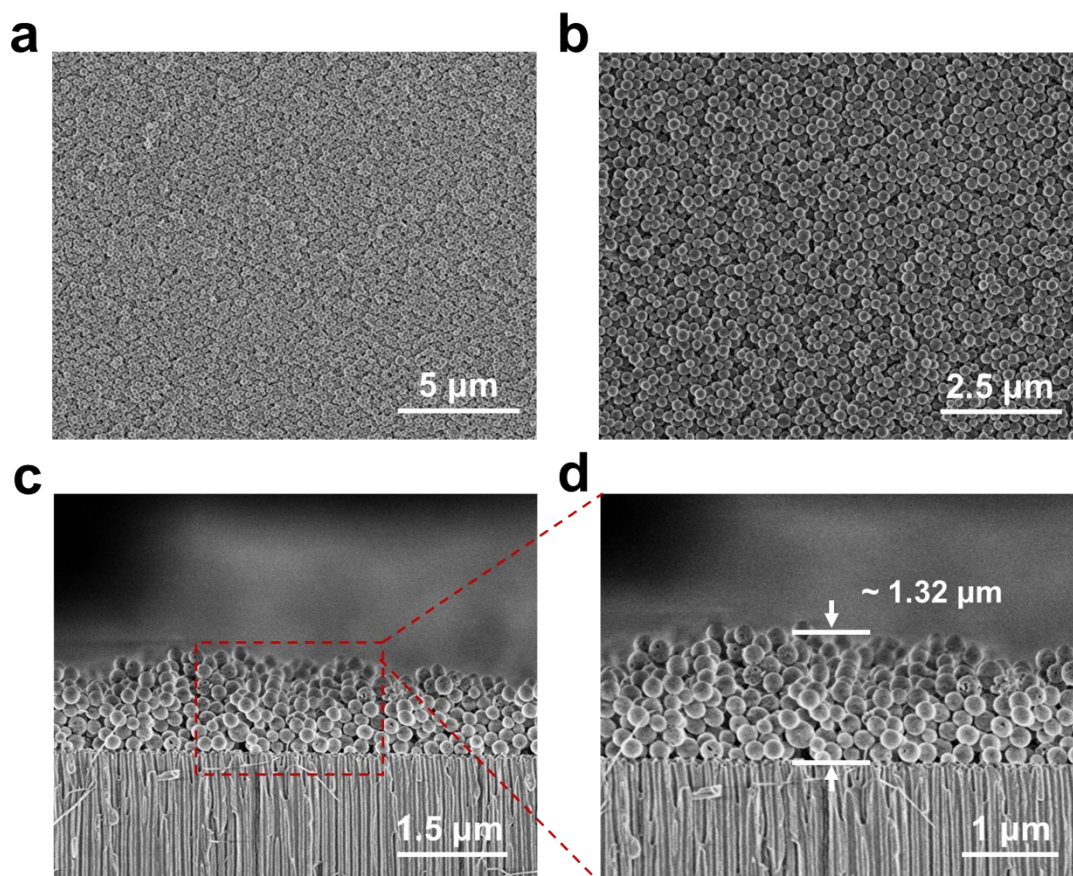

**Fig. S9** Surface SEM images (a, b) and cross-sectional images (c, d) of the PMO/AAO membrane with 35 wt % loading of PMOs.

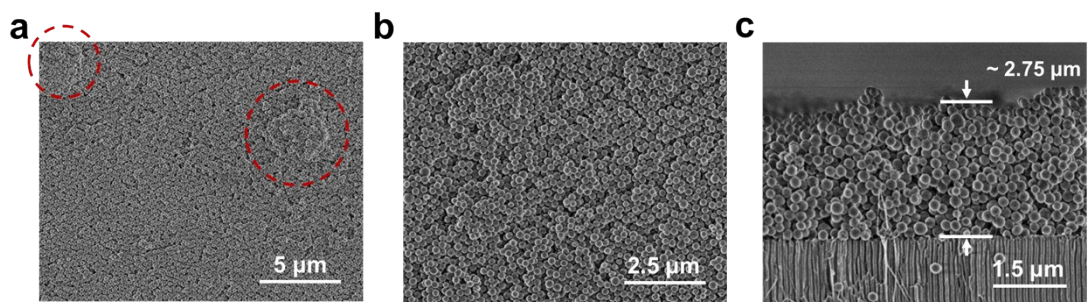

**Fig. S10** Surface SEM images (a, b) and cross-sectional image (c) of the PMO/AAO membrane with 45 wt % loading of PMOs.

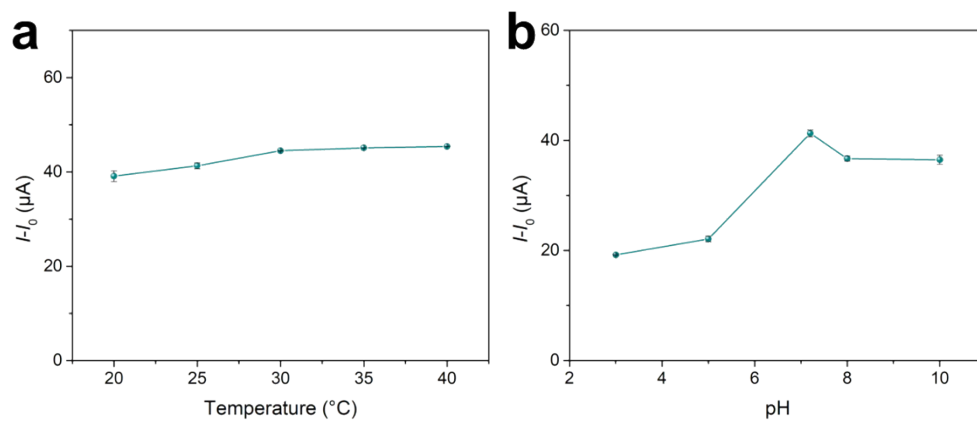

**Fig. S11** (a) Effect of temperature on the detection of GSH (10 mM, pH = 7.2, 60 min).

(b) Effect of pH on the detection of GSH (10 mM, T = 25  $^{\circ}\text{C}$ , 60 min).

**Table S1** Sensing of GSH in FBS samples

| <b>Added<br/>(mM)</b> | <b>Founded<sup>a</sup><br/>(mM)</b> | <b>Recovery<sup>b</sup><br/>(%)</b> |
|-----------------------|-------------------------------------|-------------------------------------|
| <b>0.05</b>           | 0.045 ± 0.006                       | 90.6                                |
| <b>0.1</b>            | 0.118 ± 0.098                       | 118.4                               |

<sup>a</sup>Mean and standard deviation (SD) of the results (n = 3)

<sup>b</sup>Recovery (%) =  $C_{\text{GSH founded}} / C_{\text{GSH added}} * 100$
